# Supplementary material
Source: PubMed Central journal article supplement (PMC5798462)
Supplement: NIHMS937941-supplement-1.pdf [file NIHMS937941-supplement-1.pdf]

**Cell Reports, Volume 22**

**Supplemental Information**

**Epithelial WNT Ligands Are Essential**

**Drivers of Intestinal Stem Cell Activation**

**Winnie Y. Zou, Sarah E. Blutt, Xi-Lei Zeng, Min-Shan Chen, Yuan-Hung Lo, David Castillo-Azofeifa, Ophir D. Klein, Noah F. Shroyer, Mark Donowitz, and Mary K. Estes**

## SUPPLEMENTAL EXPERIMENTAL PROCEDURES

**Flow cytometry.** Crypts isolated from previous steps were made into single cell suspensions by incubating with 0.8mg/mL dispase solution at 37°C for 10min. Solution was vortexed every 2min to ensure single cell dissociation. 1mL Fetal Bovine Serum (FBS) was added to stop the enzymatic digestion and 50uL 10mg/μL DNase was added to prevent cell clumps. Single cells were filtered through a 40μm cell strainer (BD Falcon) and then spun down at 1000g, 4°C for 5 min. 10% FBS in HBSS was used to wash cells before proceeding to antibody staining. Please refer to **Table S1** for a list of antibodies and respective dilutions. n in all experiments refer to separate crypt preps from different animals in each group. Discrimination of each cell population via flow cytometry is shown in **Figure S3**. Dead cells and doublets were excluded using side and forward scatters. At least 30,000 live, epithelial cells were collected using the EpCam<sup>APC</sup>/DAPI gate for analysis. Lgr5-GFP<sup>high</sup> population was analyzed using previously published gating schemes (Sato et al., 2009). All data were collected using BD LSRFortessa<sup>TM</sup> and analyzed on FlowJo software. Flow cytometry data were uploaded to Flow Repository with IDs: FR-FCM-ZYF8 and FR-FCM-ZYF9.

**Reverse transcription-quantitative PCR (RT-qPCR) analysis.** Crypts were isolated from control- or RV-infected mice small intestine. Total RNA was extracted from isolated crypts using the Zymo Research Directo-zol<sup>TM</sup> RNA kit, following the manufacture's protocol. The amount and purity of RNA were determined using a NanoDrop spectrophotometer (Thermo Scientific, Waltham, TA). Reverse transcription-quantitative PCR (RT-qPCR) was performed on a StepOnePlus real-time PCR system (Applied Biosystems, Foster City, CA), using One-Step RT-qPCR ToughMix with the ROX reference dye according to the manufacturer's protocol (Quanta Biosciences, Gaithersburg,

MD). TaqMan primer-probe mixes were obtained from Molecular Probes (Eugene, OR), with the assay identification numbers listed in **Table S2**. Expression levels were normalized to *Gapdh* levels and analyzed with StepOne v2.1 software (Applied Biosystems) by using the  $2^{-\Delta\Delta CT}$  method as previously described (Schmittgen and Livak, 2008). n in all experiments refer to biological replicates, with two technical RT-qPCR replicates for each biological replicate. Dots represent relative gene expression of a single animal. Bars represent means  $\pm$  SD of respective groups. Statistical analyses were performed using Student's t-test. \*p < 0.05.

**Tissue staining.** Intestinal tissues were fixed in 4% paraformaldehyde in PBS at 4°C overnight, transferred to 70% ethanol, paraffin-embedded, and sectioned at 5  $\mu$ m thickness. Paraffin-embedded sections were deparaffinized and rehydrated before staining. Antigen retrieval was performed using sodium citrate buffer (10 mM sodium citrate pH 6.0).

For immunofluorescence, the sections were blocked using BioGenex Power Block™ Universal Block Reagent at room temperature (RT) for 5 min and then incubated with primary antibody at 4°C overnight. Slides were washed three times with PBST (0.05% Tween 20 in PBS) at RT for 5 min and incubated with secondary antibody at RT for 1 h. Slides were then washed three times again with PBST and mounted by VECTASHIELD Antifade Mounting Medium with DAPI (Vector Laboratories). For immunohistochemistry, endogenous peroxidase were quenched by 3% H<sub>2</sub>O<sub>2</sub> in methanol for 20 min at RT. The sections were then blocked by Avidin/Biotin and animal serum for 15 min each at RT. Then, primary antibody were incubated at 4°C overnight. Slides were washed by PBST at RT for 5 min three times and incubated with secondary antibody at RT for 0.5

h. Slides were then washed three times again by PBST and visualized via ABC and DAB reagents (Vector Laboratories). A hematoxylin counterstain was used before dehydration and mounting using Permount Mounting Medium (Fisher Scientific). For EdU detection, the Click-iT<sup>®</sup> EdU Alexa Fluor<sup>®</sup> 488 Imaging Kit (ThermoFisher Scientific) were used according to the manufacture's protocols.

Please see **Table S1** for a list of antibodies and respective dilutions. Immunofluorescent confocal images were captured using a Nikon A1-Rs confocal laser scanning microscope. Light microscopy images were captured using a Biotek Cytation 5 Imager and Plate Reader or a Nikon Ci-L Upright Microscope. All image analyses were performed using the Integrated Microscopy Core at Baylor College of Medicine.

### **RNA *in situ* hybridization and RNAScope<sup>®</sup>**

Detection of *Axin2* mRNA by *in situ* hybridization was performed as described (Gregorieff and Clevers, 2010) on tissue fixed by immersion in 4% paraformaldehyde (PFA) in phosphate-buffered saline (PBS) for 15 minutes and embedded in Tissue-Tek O.C.T. Compound. Digoxigenin (DIG)-labeled *Axin2* antisense RNA probe was generated by *in vitro* transcription using NotI and SP6 polymerase (plasmid provided by I. Thesleff). *Wnt3* was detected on paraffin-embedded intestinal slides using RNAScope<sup>®</sup> probe 312241 following manufacturer's protocols.

### **SUPPLEMENTAL REFERENCES**

- GREGORIEFF, A. & CLEVERS, H. 2010. In situ hybridization to identify gut stem cells. *Current protocols in stem cell biology*, 2F. 1.1-2F. 1.11.
- SATO, T., VRIES, R. G., SNIPPERT, H. J., VAN DE WETERING, M., BARKER, N., STANGE, D. E., VAN ES, J. H., ABO, A., KUJALA, P., PETERS, P. J. & CLEVERS, H. 2009. Single Lgr5 stem cells build crypt-villus structures in vitro without a mesenchymal niche. *Nature*, 459, 262-5.
- SCHMITTGEN, T. D. & LIVAK, K. J. 2008. Analyzing real-time PCR data by the comparative C(T) method. *Nat Protoc*, 3, 1101-8.

**Figure S1.**

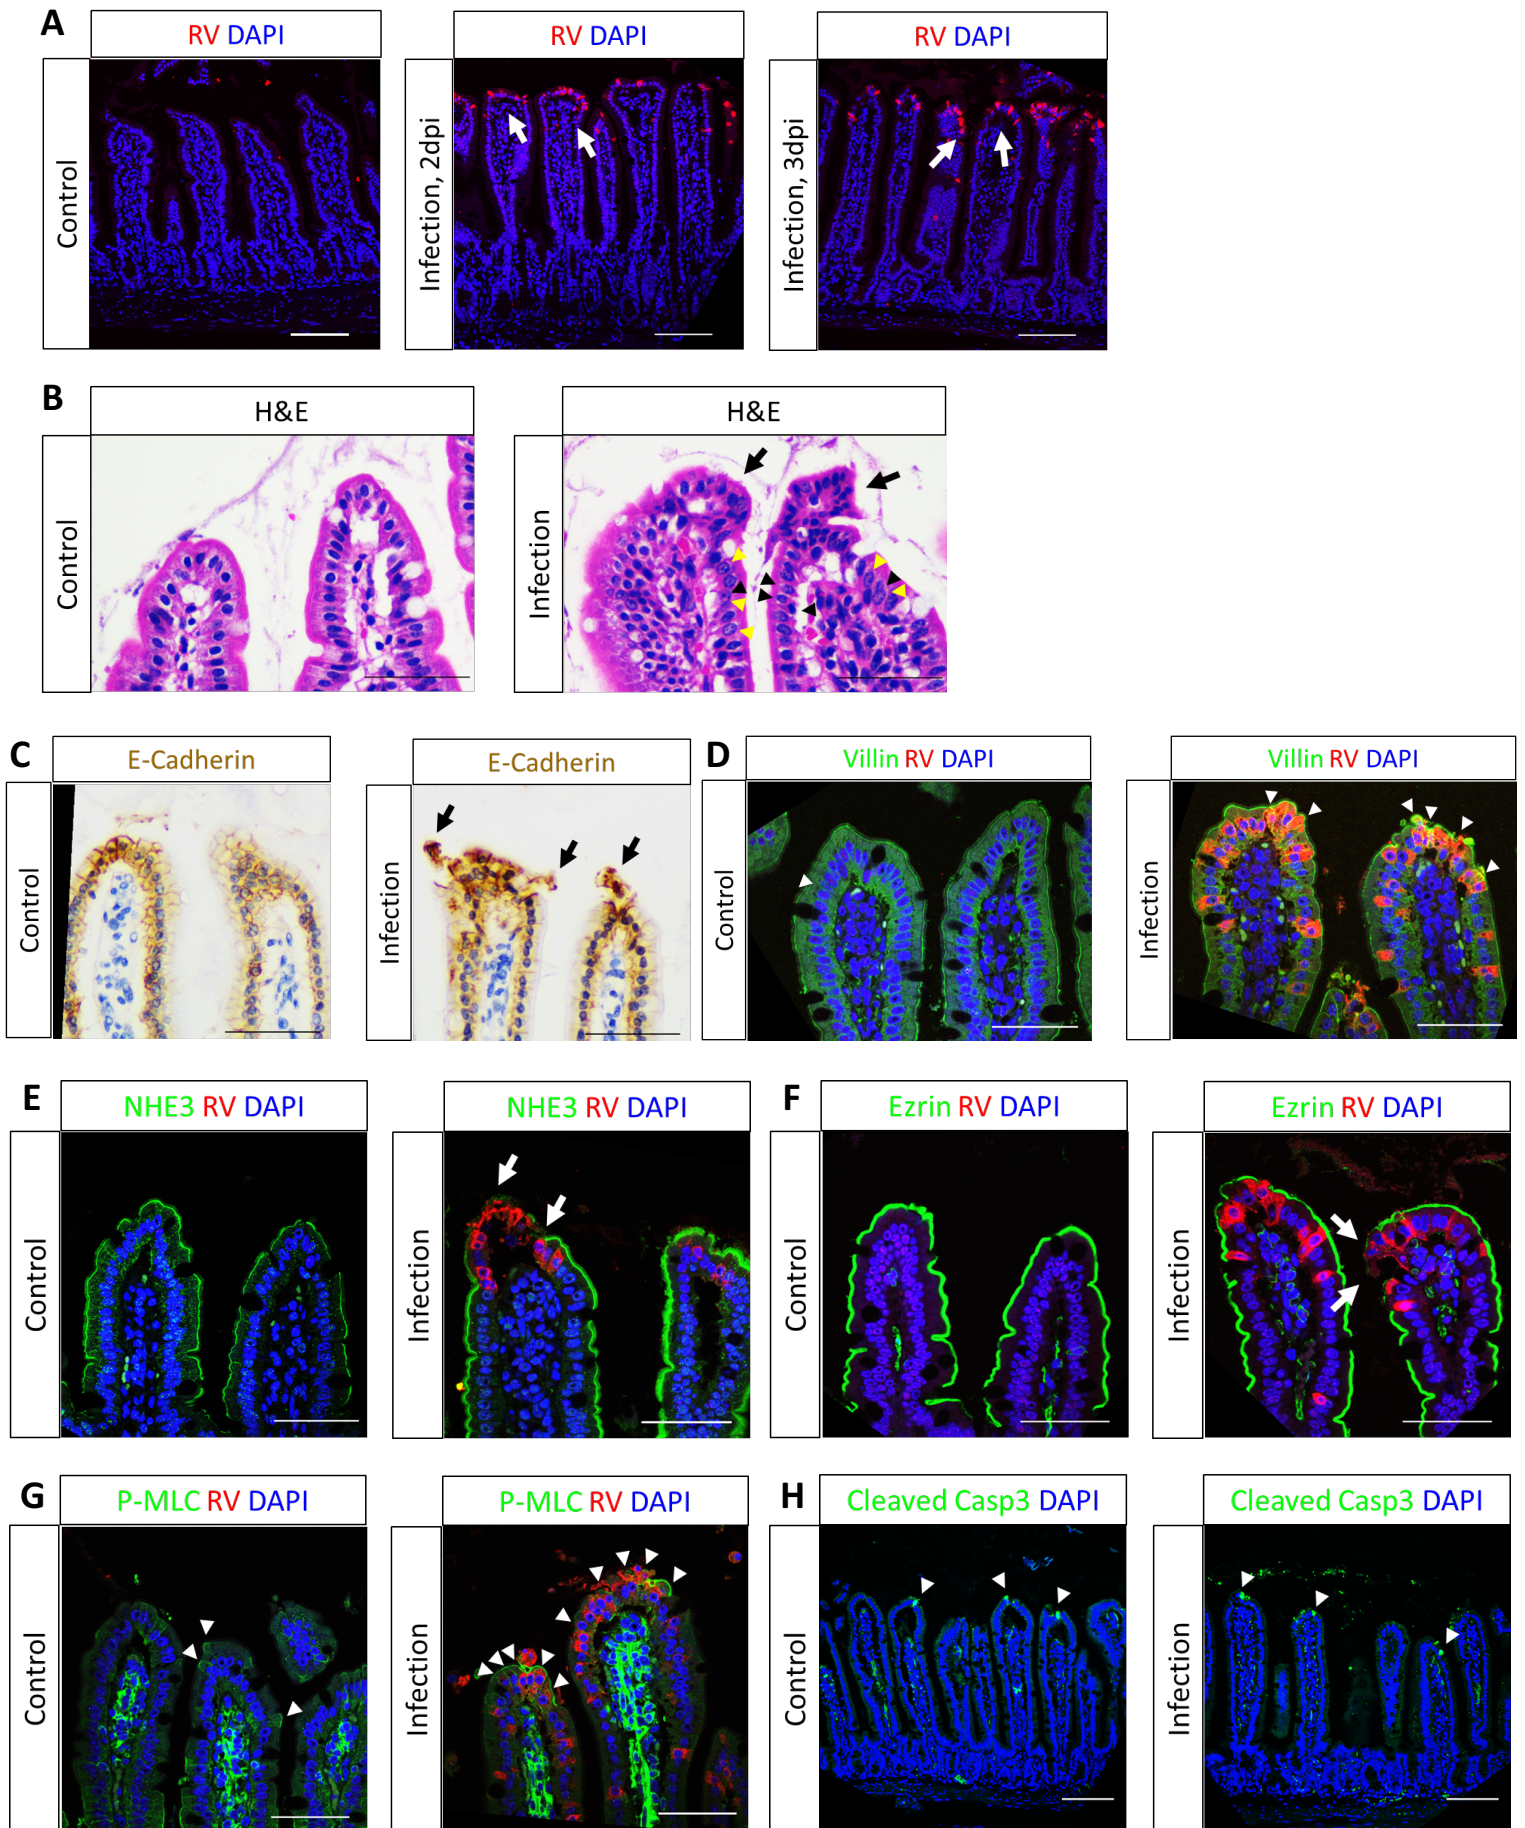

**Figure S1.** Related to Figure 1. **RV infection causes localized damage at tips of villi.** **(A)** Representative confocal images of control- and RV-infected mouse epithelium at 2dpi and 3dpi. RV-infected cells are detected using a laboratory-generated, polyclonal guinea pig anti-RV antibody that detects viral structural proteins. Infected villi are noted by white arrows. **(B)** Representative H&E images of control- vs. RV-infected villi at 4dpi. Black arrows denote altered shedding at the tip of the villus. Black arrowheads denote nuclei mis-positioned either towards the apical or the basolateral surface of the cell. Yellow arrowheads denote distorted and enlarged nuclei with hypodense hematoxylin stain. **(C)** Representative immunohistochemistry staining of E-Cadherin staining in control- and RV-infected animals at 4dpi. E-Cadherin protein is mis-localized to the cytoplasm in RV-infected villus tip cells. Black arrows point to shedding cells with fragmented nuclei, indicating necrosis. **(D)** Representative confocal images of villin and RV staining in control- and RV-infected animals at 4dpi. White arrowheads denote irregular villin staining in infected villus tips with intensified villin stain on the apical cell surface and its mis-localization to the cytoplasm. **(E)** Representative confocal images of sodium–hydrogen antiporter 3 (NHE3) and RV staining in control- and RV-infected animals at 4dpi. NHE3 protein is lost in parts of RV-infected villi (white arrowheads). **(F)** Representative confocal images of ezrin and RV staining in control- and RV-infected animals at 4dpi. Ezrin protein is lost in parts of RV-infected cells (white arrowheads). **(G)** Representative confocal images of phosphorylated myosin light chain (P-MLC), a marker of anoikis, and RV staining in control- and RV-infected animals at 4dpi. P-MLC-labeled cells are increased in number following RV infection (white arrowheads). **(H)** Representative confocal images of cleaved caspase 3 (cleaved casp3), a marker of apoptosis, in control- and RV-infected animals at 4dpi. Cleaved casp3-labeled cells remained stable following RV infection (white arrowheads). Scale bars: 100  $\mu$ m in A and H, 50  $\mu$ m in B-G.

**Figure S2.**

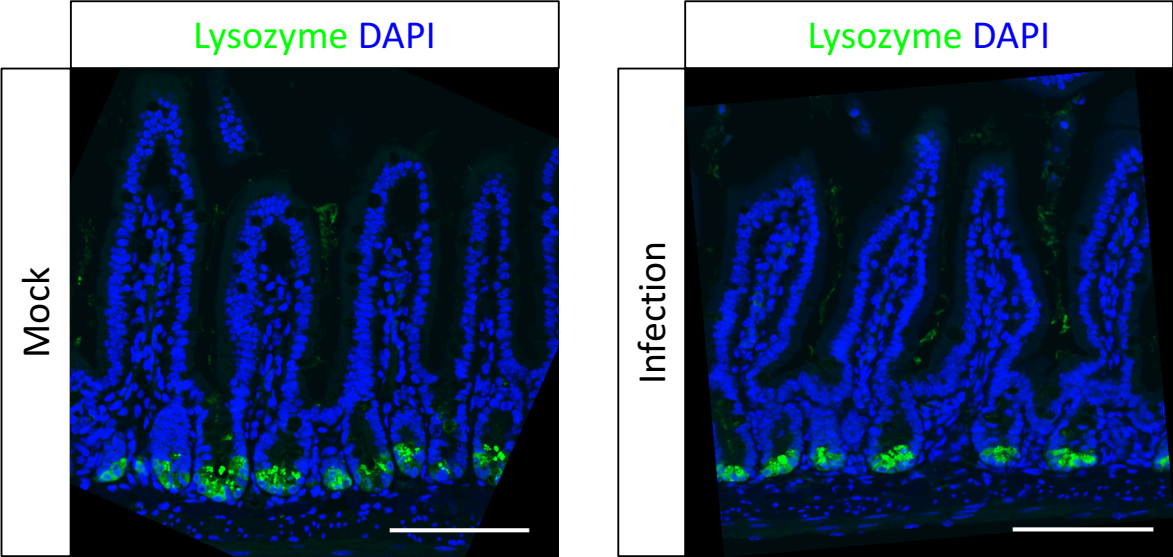

**Figure S2.** Related to Figure 1. **Paneth cells are intact in RV-infected animals.** Representative confocal images of lysozyme staining in control- and RV-infected animals at 4dpi. Scale bars: 100  $\mu$ m.



Figure S3.

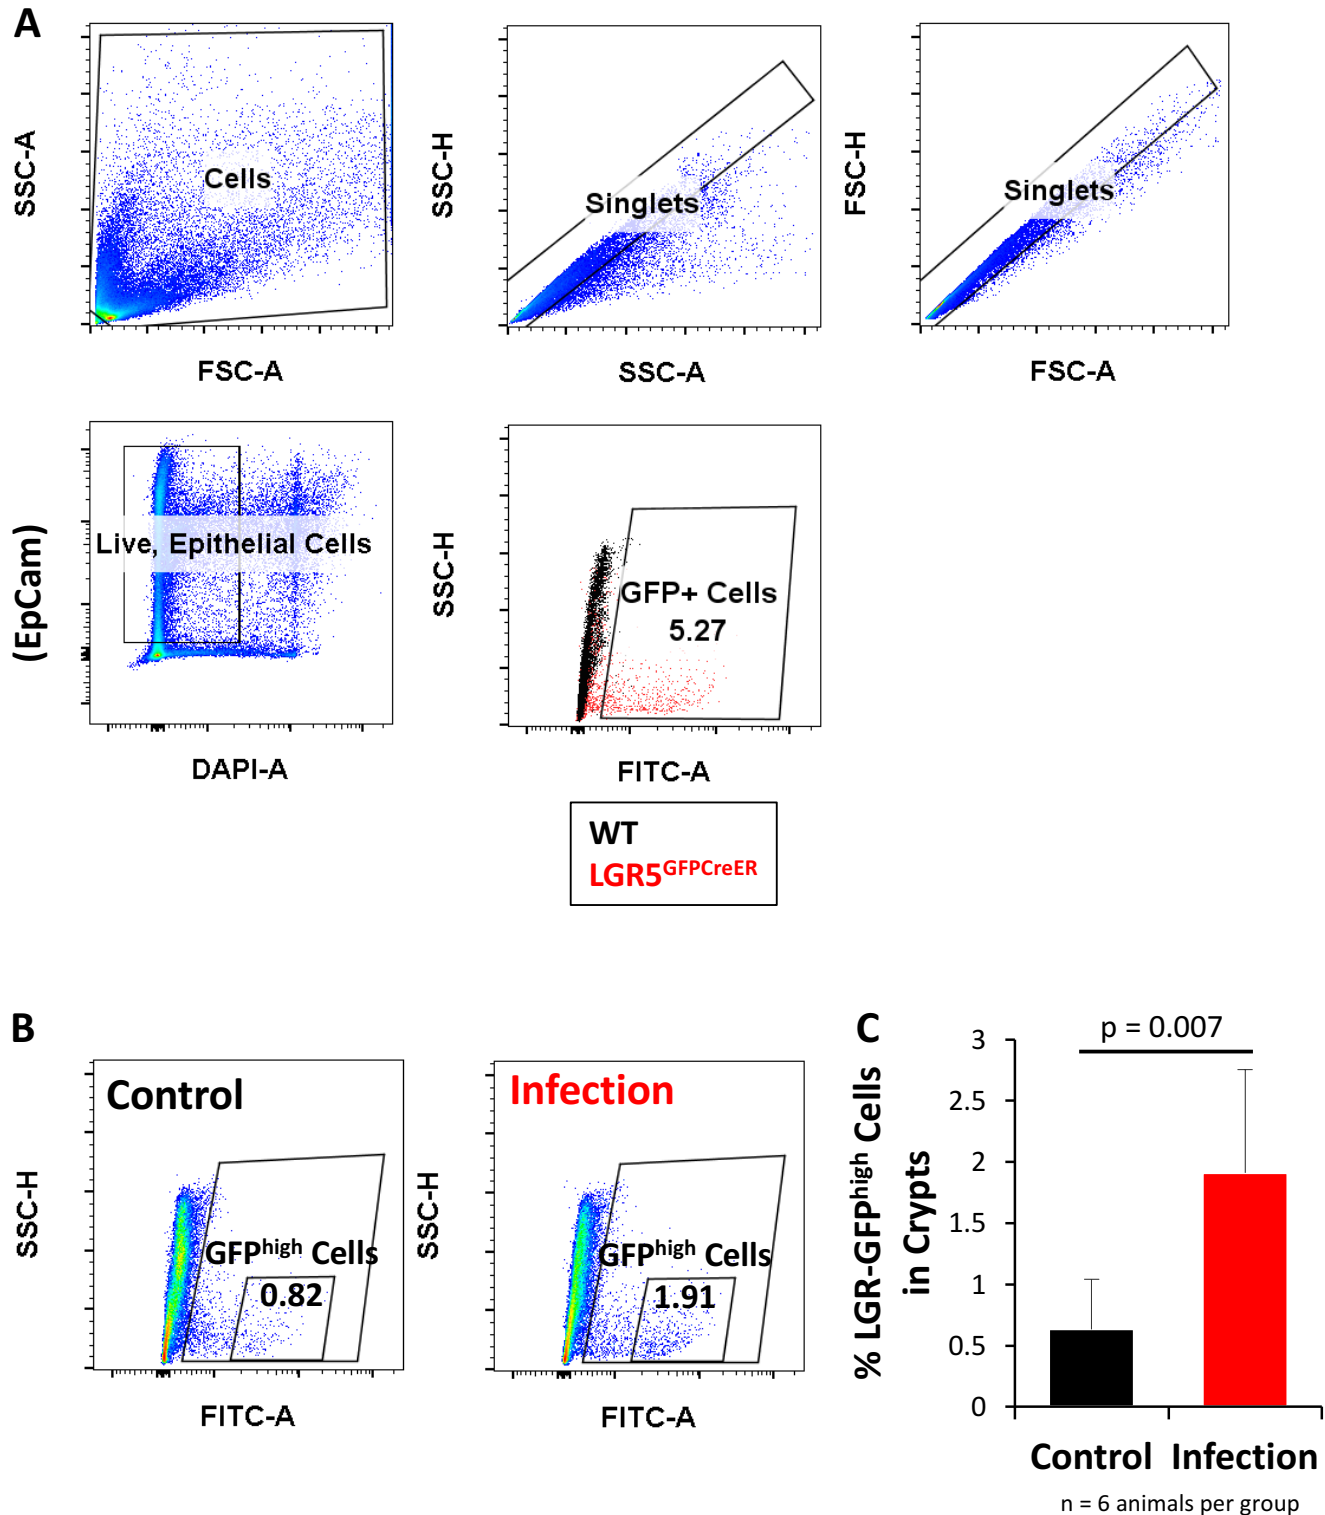

**Figure S3.** Related to Figure 3. **LGR5-GFP<sup>high</sup> cells are increased in number following RV infection.** (A) Representative flow gating scheme for isolating viable (DAPI<sup>neg</sup>), single intestinal epithelial cells (EpCAM<sup>pos</sup>), then *Lgr5*<sup>GFP</sup>CreERT population. All flow analysis were performed using crypt-enriched epithelial preparation. (B) Representative flow cytometry analysis of LGR5-GFP<sup>high</sup> cell population in control- and RV-infected *LGR5*<sup>GFP</sup>CreERT mice. (C) Quantification of LGR5-GFP<sup>high</sup> cell population in control- and RV-infected animals (n= 6 mice per group with at least two independent experiments).

**Figure S4.**

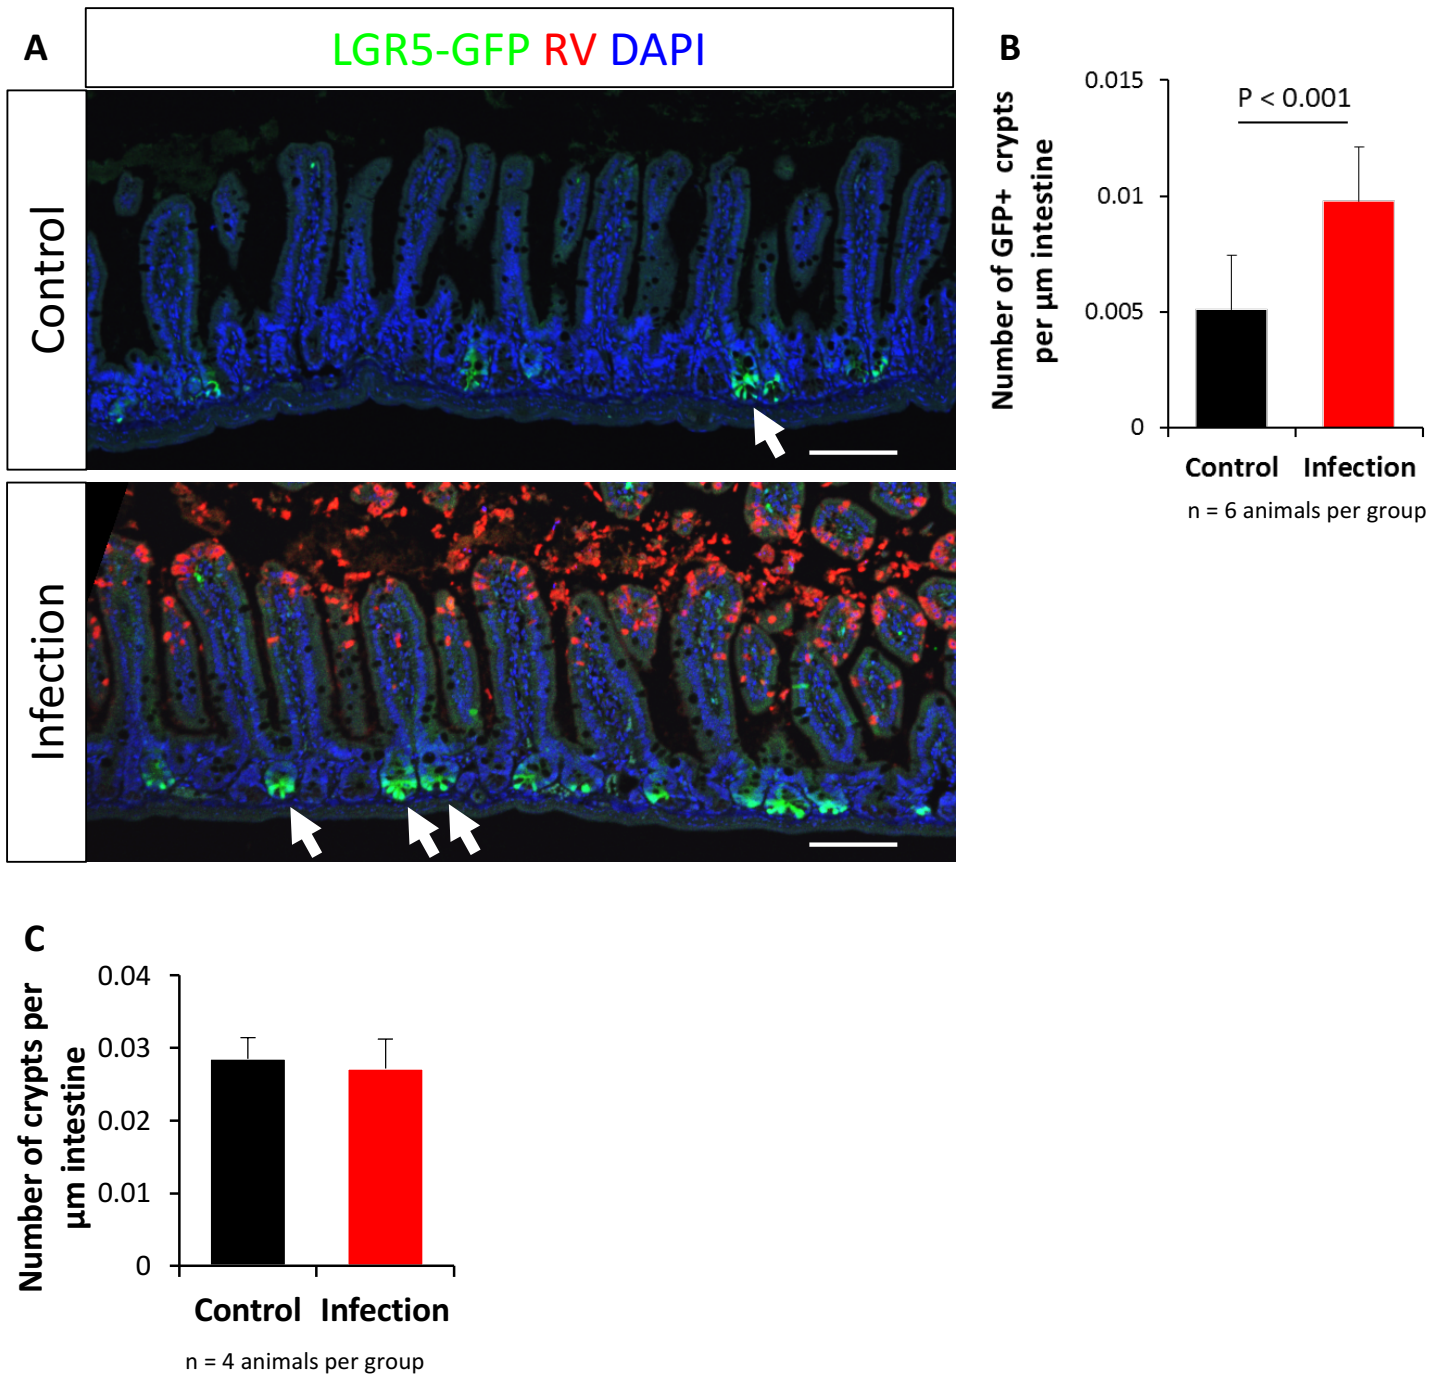

**Figure S4.** Related to Figure 3. **RV infection resulted in increased number of LGR5+ crypts.** (A) Representative immunofluorescent image of LGR5+ crypts in control- and RV-infected mice. Scale bar: 100  $\mu\text{m}$ . (B) Quantification of LGR5+ crypts per  $\mu\text{m}$  of intestine in control- and RV-infected animals (n= 6 mice per group with at least two independent experiments). (C) Quantification of number of crypts per  $\mu\text{m}$  of intestine in control- and RV-infected animals (n= 4 mice per group with at least two independent experiments).

**Figure S5.**

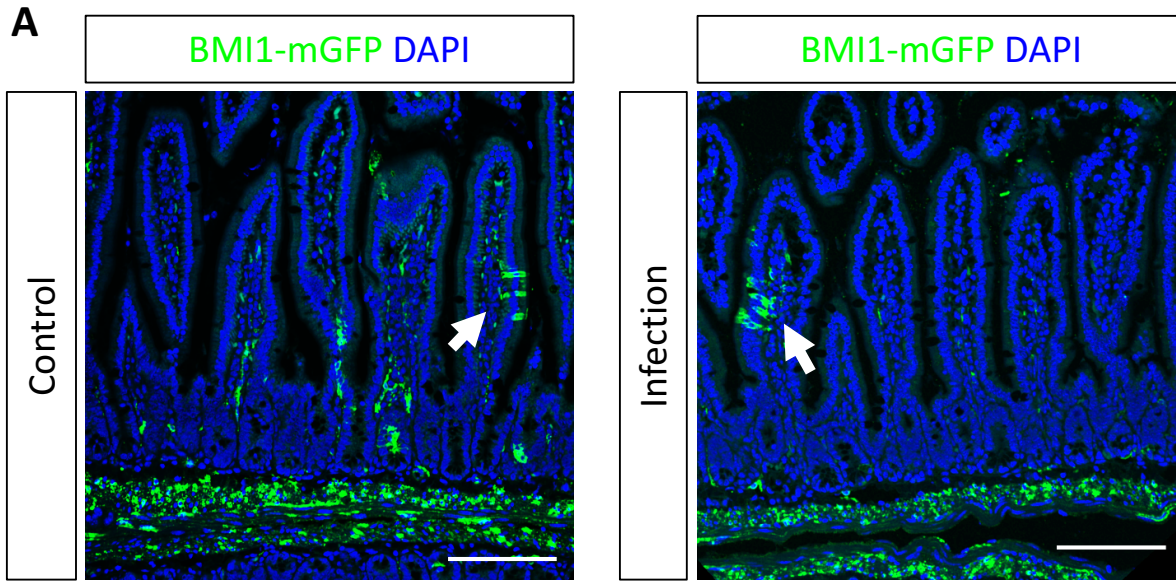

**Figure S5.** Related to Figure 3. **BMI1 lineage is not changed following RV infection.** Representative confocal images of *Bmi1<sup>Cre</sup>;R26<sup>mTmG</sup>* mice 7 days after tamoxifen injection and RV infection. BMI1 lineage remained similar in control- and RV-infected animals (white arrows). Scale bar: 100  $\mu$ m.

**Figure S6.**

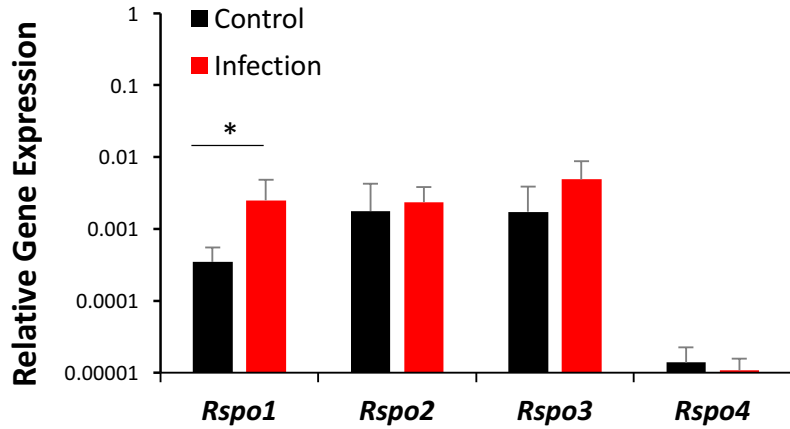

**Figure S6.** Related to Figure 4. **Upregulation of *R-Spondin 1* following RV infection.** RT-qPCR results showed expression of the *R-Spondin* family genes in isolated mesenchyme of WT mice following RV infection. Transcripts were normalized to *Gapdh* and relative gene expression was obtained using the  $2^{-\Delta\Delta Ct}$  method (n = 3 mice per group in at least 2 independent experiments). Dots represent relative gene expression of one animal. Bars represent means  $\pm$  standard deviation of respective groups. Statistical analyses were performed using Student's t-test. \*p < 0.05.

Figure S7.

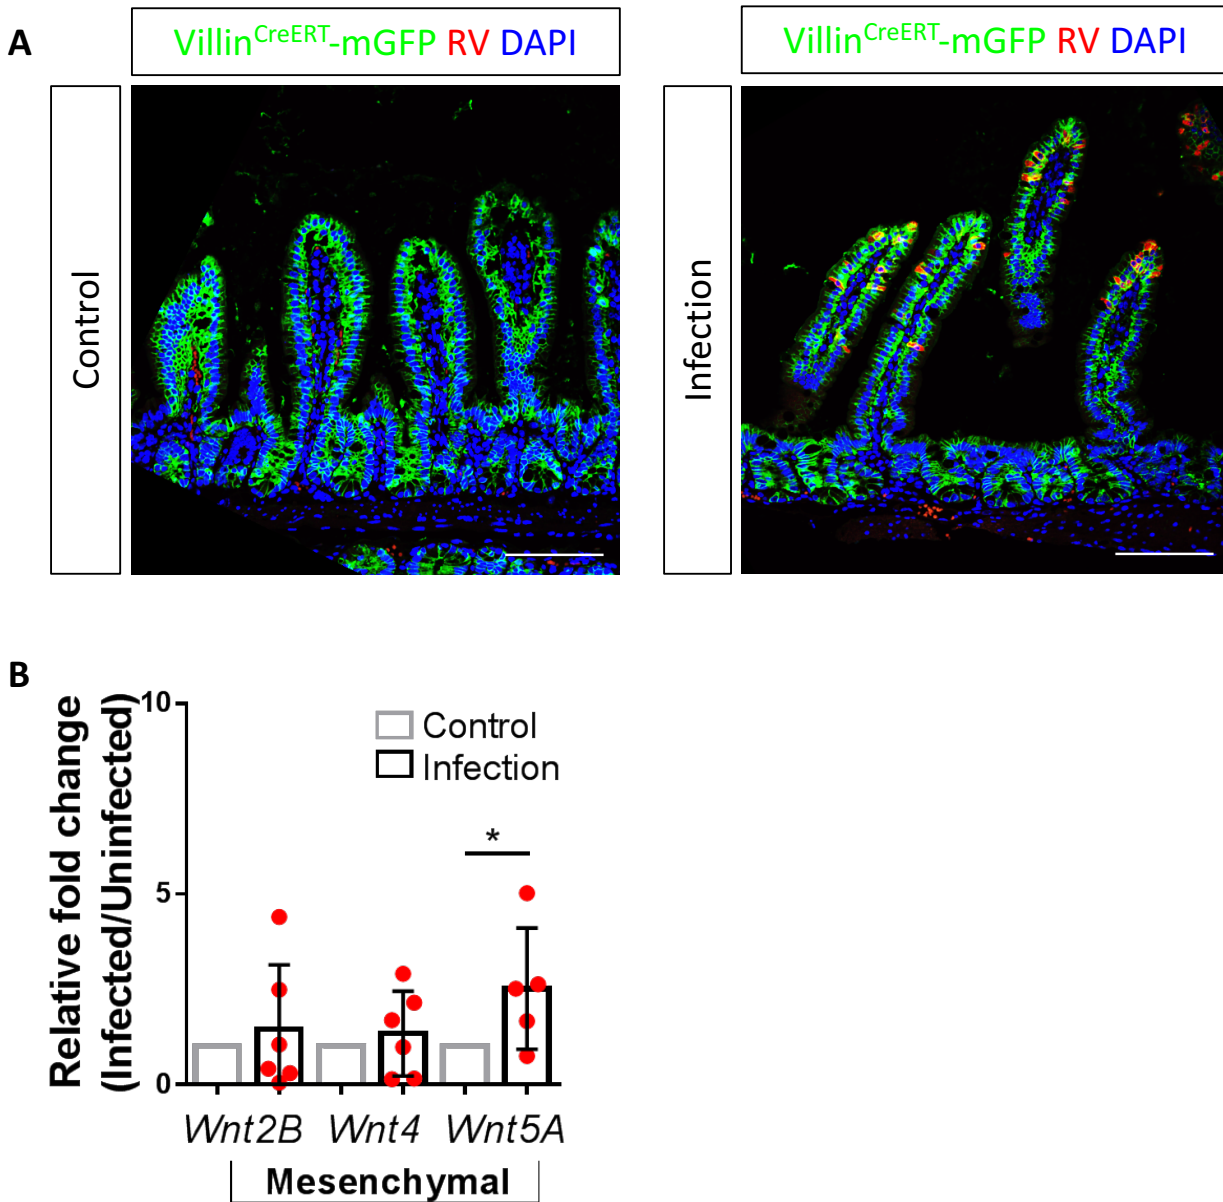

**Figure S7.** Related to Figure 5. **Epithelial WLS conditional KO results in mesenchymal *Wnt5A* upregulation following infection.** (A) Representative confocal images of *Villin<sup>CreERT</sup>;WLS<sup>f/f</sup>;R26<sup>mTmG</sup>* (WLS KO) mouse following tamoxifen injection in control and RV infection. mGFP+ cells represent epithelial cells with *Wntless* gene knockout. RV infected cells (red) visualized by guinea pig polyclonal serum that detected viral structural proteins. Scar bar: 100  $\mu$ m. (B) RT-qPCR results showed expression of the mesenchymal *Wnt* family genes in isolated mesenchyme from WLS KO mice following RV infection. Transcripts were normalized to *Gapdh* and relative gene expression was obtained using the  $2^{-\Delta\Delta Ct}$  method (n = 6 mice per group). Dots represent relative gene expression of one animal. Bars represent means  $\pm$  standard deviation of respective groups. Statistical analyses were performed using Student's t-test. \*p < 0.05.

**Table S1.** Related to Material and Methods. **Antibody information and dilutions for flow cytometry and immunofluorescence.**

| <b>Antibody</b>  | <b>Host</b> | <b>Company and Catalogue no.</b> | <b>Dilution</b> |
|------------------|-------------|----------------------------------|-----------------|
| EpCam/CD326      | Rat         | BioLegend 118213                 | 1:200           |
| GFP              | Goat        | Abcam Ab6662                     | 1:500           |
| Lysozyme         | Rabbit      | ThermoFisher 18-0039             | 1:1000          |
| OLFM4            | Rabbit      | Cell signaling 39141             | 1:200           |
| PCNA             | Mouse       | Cell Signaling 2586              | 1:500           |
| RV (GP511)       | Guinea pig  | Laboratory Generated             | 1:200           |
| $\beta$ -catenin | Rabbit      | Abcam ab32572                    | 1:500           |
| CC44v6           | Rat         | eBiosciences BMS145              | 1:1000          |
| E-Cadherin       | Mouse       | BD 610181                        | 1:1000          |
| Villin           | Goat        | Santa Cruz sc-7672               | 1:500           |
| NHE3             | Rabbit      | Novus NBP1-82574                 | 1:200           |
| Ezrin            | Rabbit      | Abcam ab76247                    | 1:200           |
| P-MLC            | Rabbit      | Cell Signaling 3671S             | 1:50            |
| Clev. Casp. 3    | Rabbit      | Cell Signaling 9551              | 1:200           |

**Table S2.** Related to Material and Methods. **TaqMan probes used for RT-qPCR gene expression analysis.**

| <b>Gene name</b> | <b>Probe ID</b> |
|------------------|-----------------|
| <i>Ascl2</i>     | Mm01268891_g1   |
| <i>Axin2</i>     | Mm00443610_m1   |
| <i>Bmi1</i>      | Mm03053308_g1   |
| <i>Ccnd1</i>     | Mm00432359_m1   |
| <i>Cd44</i>      | Mm01277161_m1   |
| <i>Dclk1</i>     | Mm00444950_m1   |
| <i>Gapdh</i>     | Mm99999915_g1   |
| <i>EphB2</i>     | Mm01181021_m1   |
| <i>Hopx</i>      | Mm00558630_m1   |
| <i>Ki67</i>      | Mm01278617_m1   |
| <i>Lgr5</i>      | Mm00438890_m1   |
| <i>Lrig1</i>     | Mm00456116_m1   |
| <i>Myc</i>       | Mm00487804_m1   |
| <i>Olfm4</i>     | Mm01320260_m1   |
| <i>Pcna</i>      | Mm00448100_g1   |
| <i>Sox9</i>      | Mm00448840_m1   |
| <i>Tert</i>      | Mm00436931_m1   |
